# Supplementary material for: Coupled analysis of steady-state and dynamic characteristics of dye-sensitized solar cells for determination of conduction band movement and recombination parameters
Source: Royal Society of Chemistry journal article supplement (doi:10.1039/c2cp42216f), 2012-09-30
Supplement: c2cp42216f.pdf [file c2cp42216f.pdf]

*Electronic Supplementary Information for*

**Coupled analysis of steady-state and dynamic characteristics  
of dye-sensitized solar cells for determination of conduction  
band movement and recombination parameters**

**YuShuai Shi<sup>a,b</sup> and XianDui Dong<sup>\*,a</sup>**

<sup>a</sup>Engineering Laboratory for Modern Analytical Techniques, State Key Laboratory of Electroanalytical  
Chemistry, Changchun Institute of Applied Chemistry, Chinese Academy of Science, Changchun  
130022, China.

<sup>b</sup>Graduate School, Chinese Academy of Sciences, Beijing 100039, China

---

\*To whom correspondence should be addressed. E-mail: dxd@ciac.jl.cn.

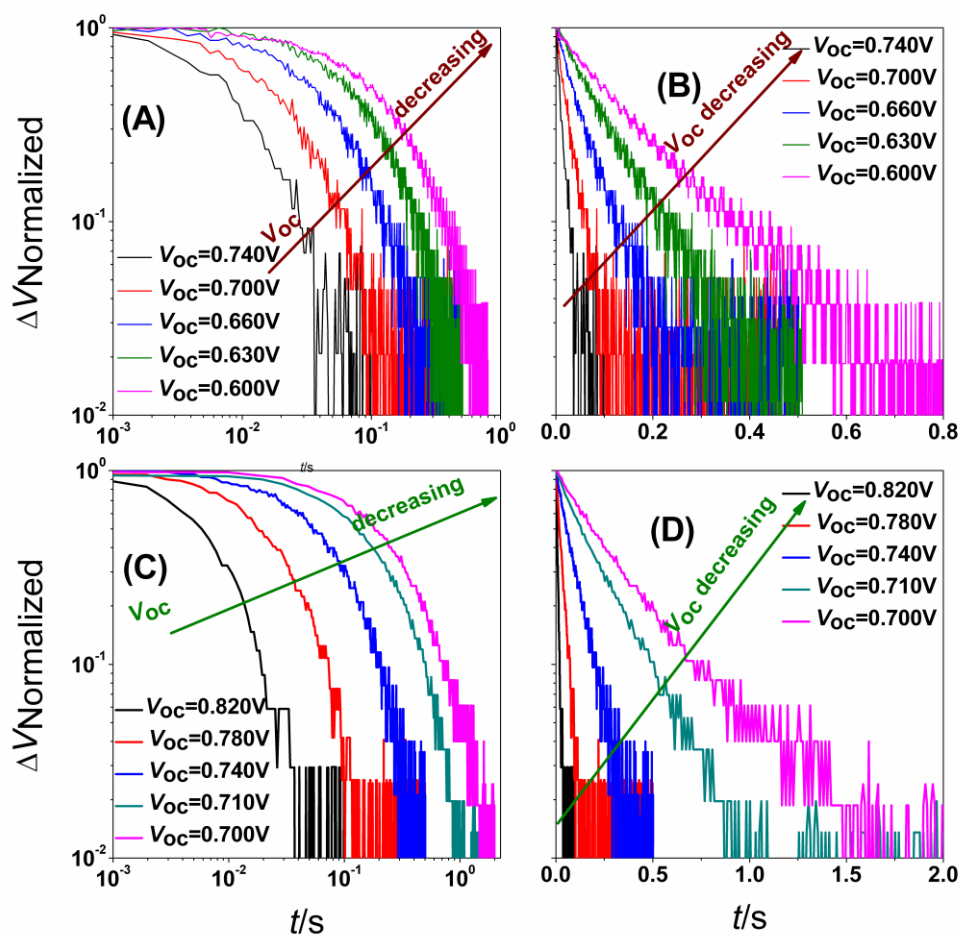

**Fig. S1** The semilog and log-log coordinates' plots of the normalized transient photovoltage decay curves: (A) and (B) for E1; (C) and (D) for E2. This validated the quality of data.
